# Supplementary material for: Genomic diversity within the haloalkaliphilic genus Thioalkalivibrio
Source: PLOS journal article supplement (doi:10.1371/journal.pone.0173517), 2017-03-10

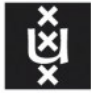

## UvA-DARE (Digital Academic Repository)

### Genomic diversity within the haloalkaliphilic genus *Thioalkalivibrio*

Ahn, A.-C.; Meier-Kolthoff, J.P.; Overmars, L.; Richter, M.; Woyke, T.; Sorokin, D.Y.; Muyzer, G.

**DOI**

[10.1371/journal.pone.0173517](https://doi.org/10.1371/journal.pone.0173517)

**Publication date**

2017

**Document Version**

Other version

**Published in**

PLoS ONE

[Link to publication](#)

**Citation for published version (APA):**

Ahn, A.-C., Meier-Kolthoff, J. P., Overmars, L., Richter, M., Woyke, T., Sorokin, D. Y., & Muyzer, G. (2017). Genomic diversity within the haloalkaliphilic genus *Thioalkalivibrio*. *PLoS ONE*, 12(3), Article e0173517. <https://doi.org/10.1371/journal.pone.0173517>

**General rights**

It is not permitted to download or to forward/distribute the text or part of it without the consent of the author(s) and/or copyright holder(s), other than for strictly personal, individual use, unless the work is under an open content license (like Creative Commons).

**Disclaimer/Complaints regulations**

If you believe that digital publication of certain material infringes any of your rights or (privacy) interests, please let the Library know, stating your reasons. In case of a legitimate complaint, the Library will make the material inaccessible and/or remove it from the website. Please Ask the Library: <https://uba.uva.nl/en/contact>, or a letter to: Library of the University of Amsterdam, Secretariat, P.O. Box 19185, 1000 GD Amsterdam, The Netherlands. You will be contacted as soon as possible.

*UvA-DARE is a service provided by the library of the University of Amsterdam (<https://dare.uva.nl>)*

*atpD*

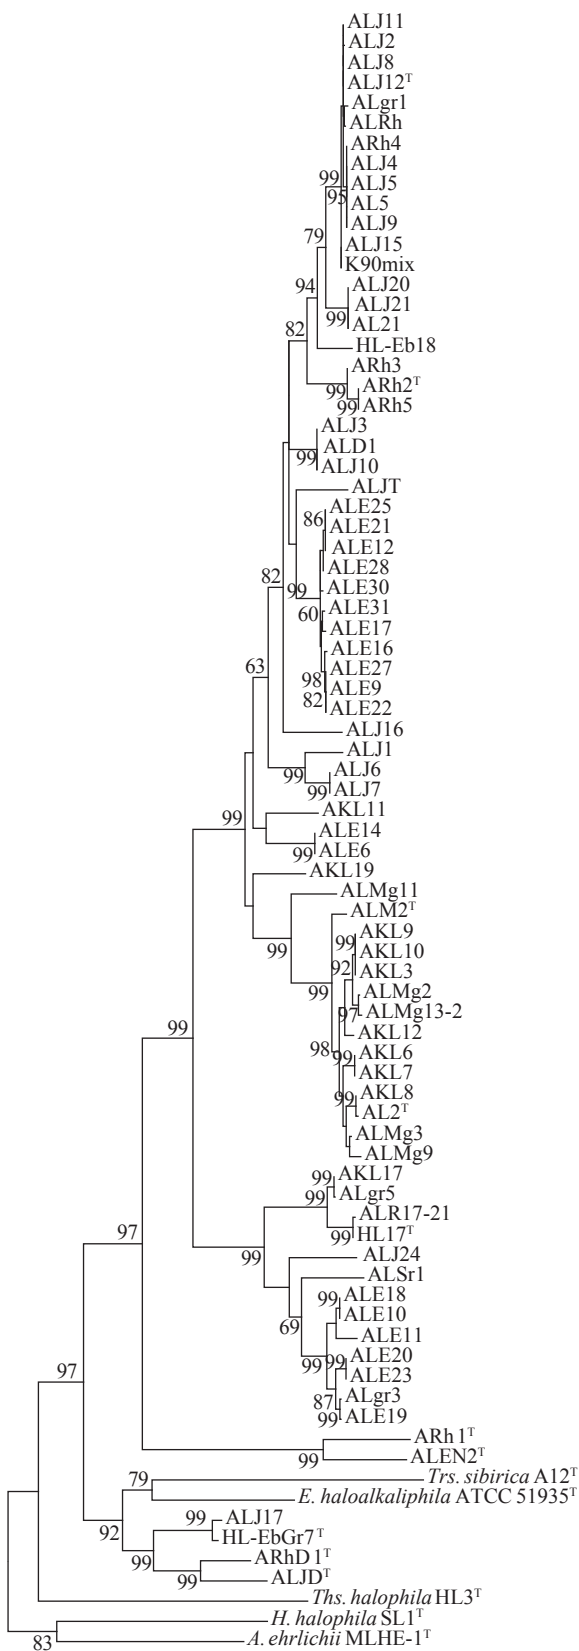

0.05

*clpA*

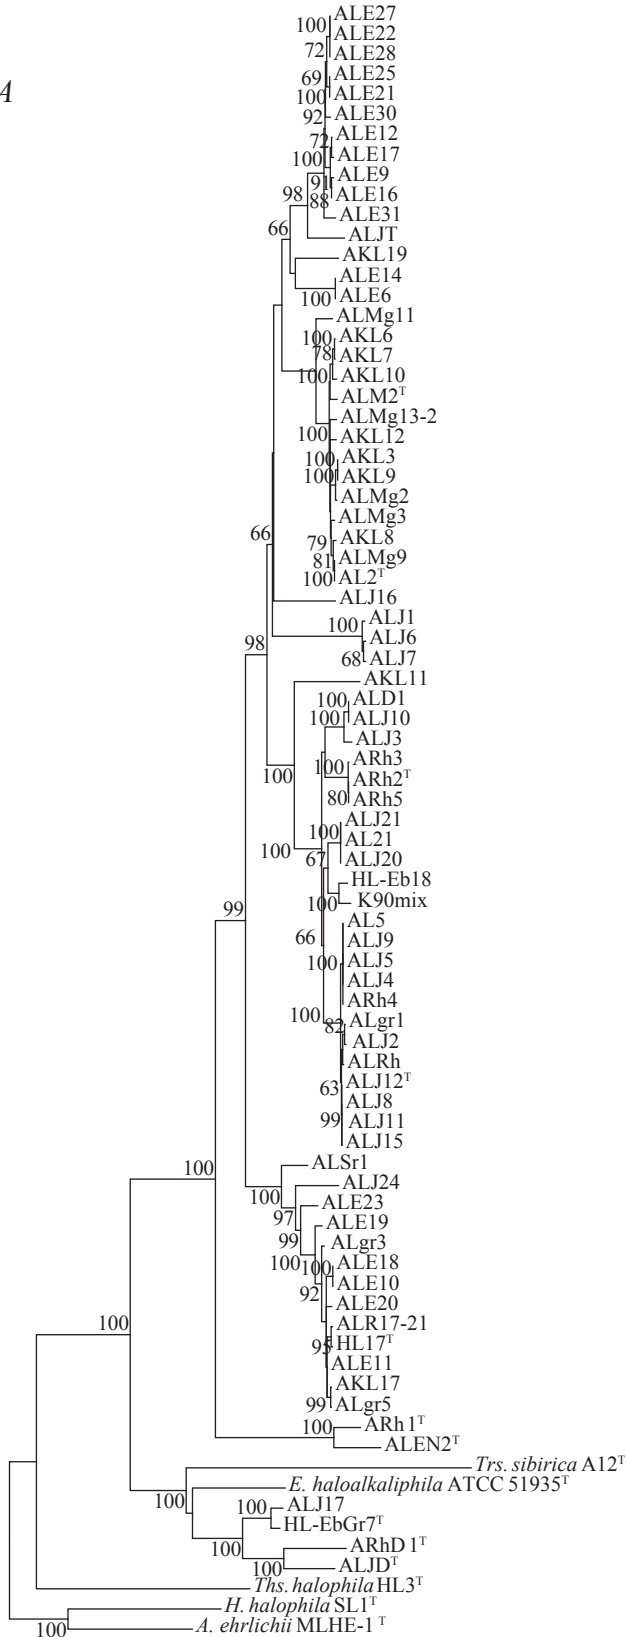

0.05

*dnaJ*

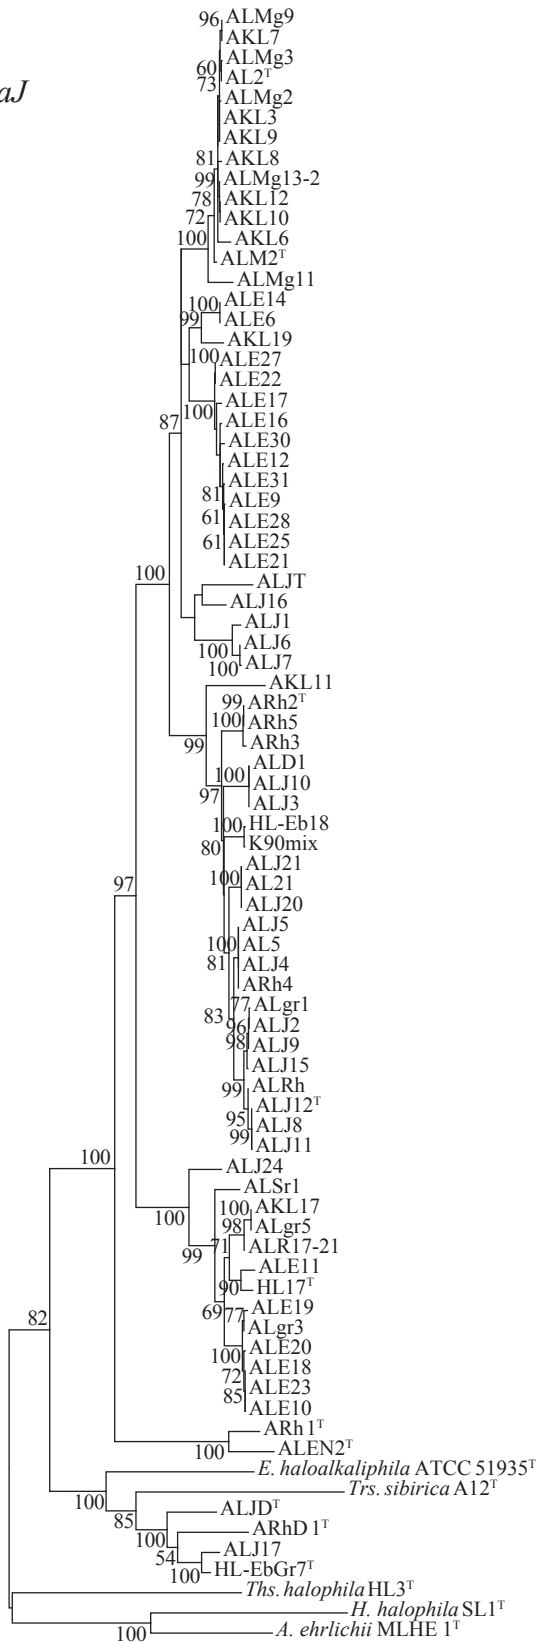

0.1

*gyrB*

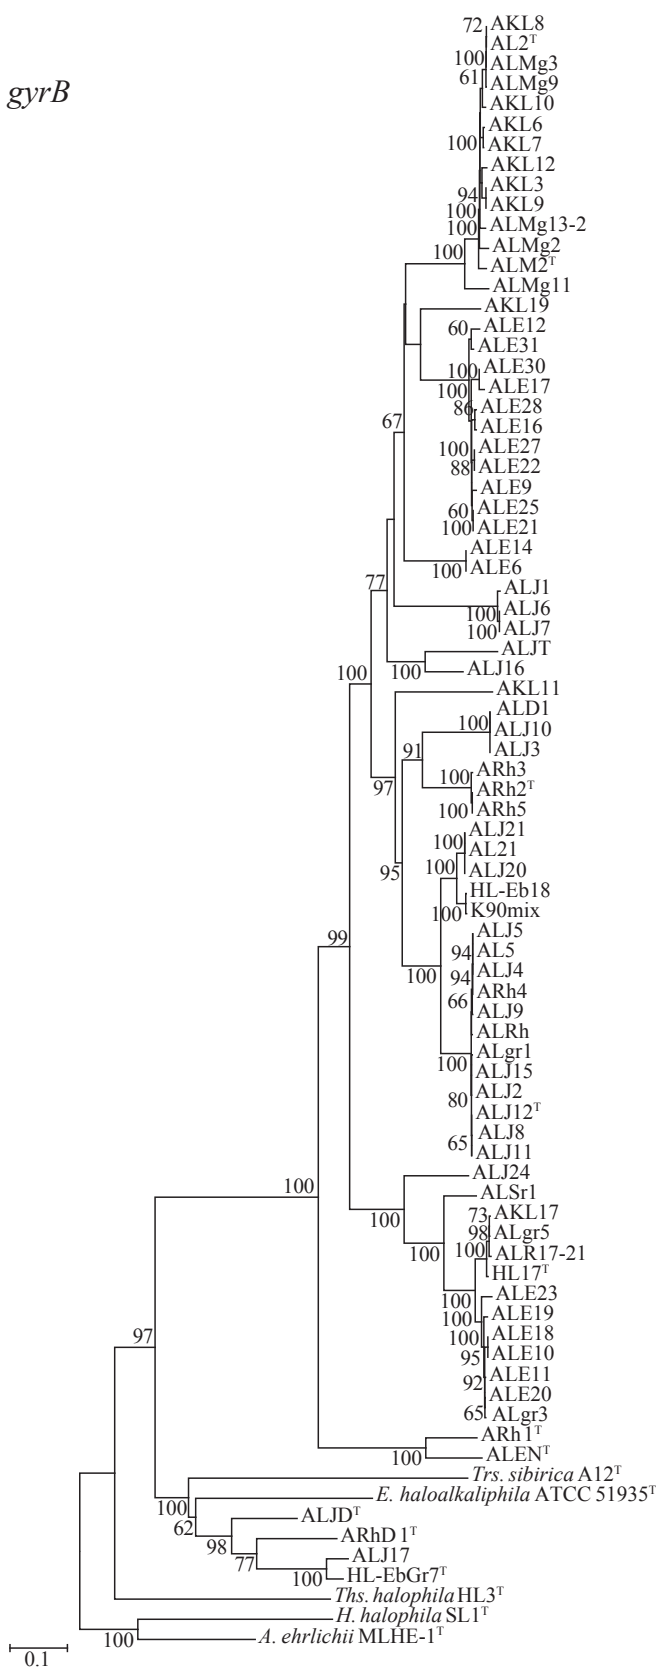

*rpoD*

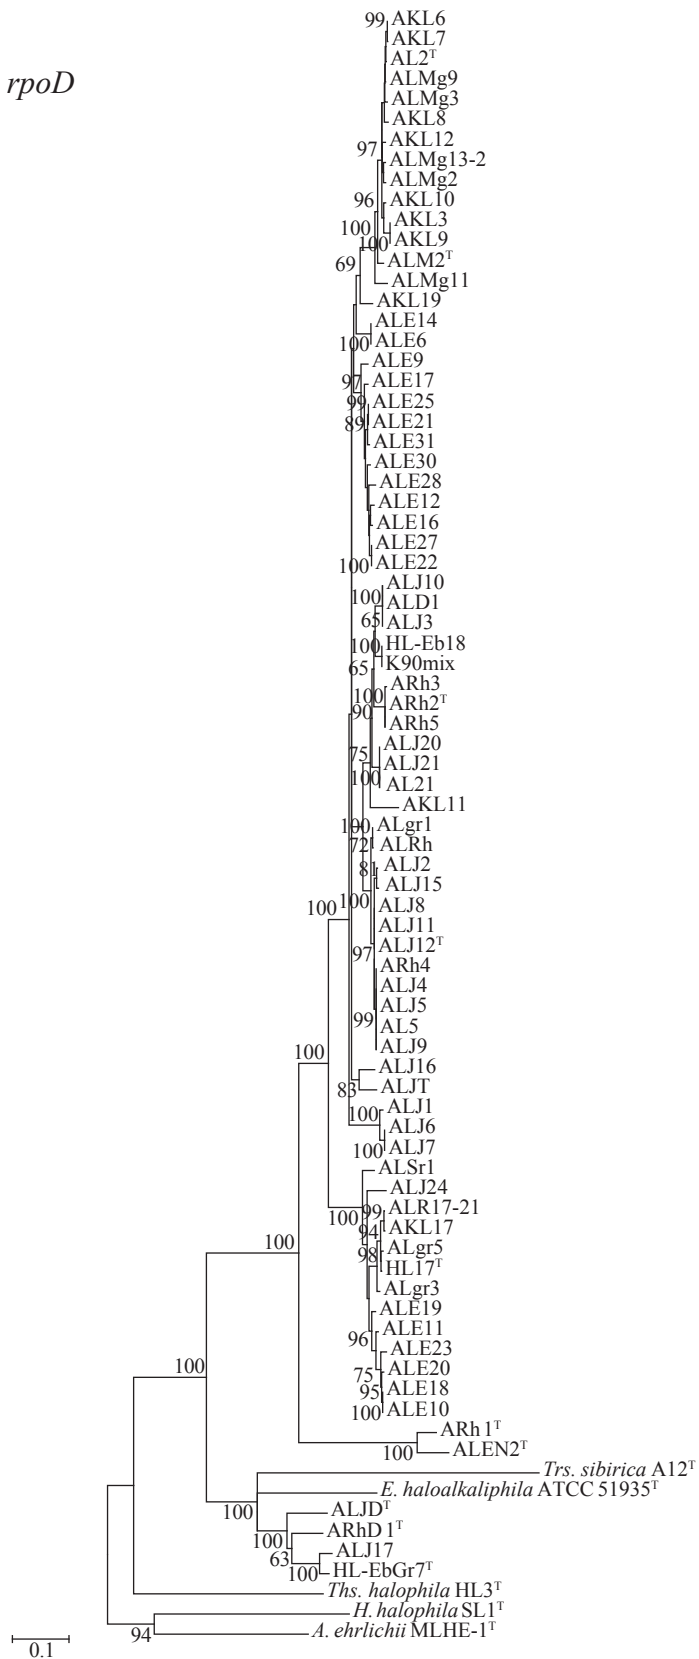

*rpoH*

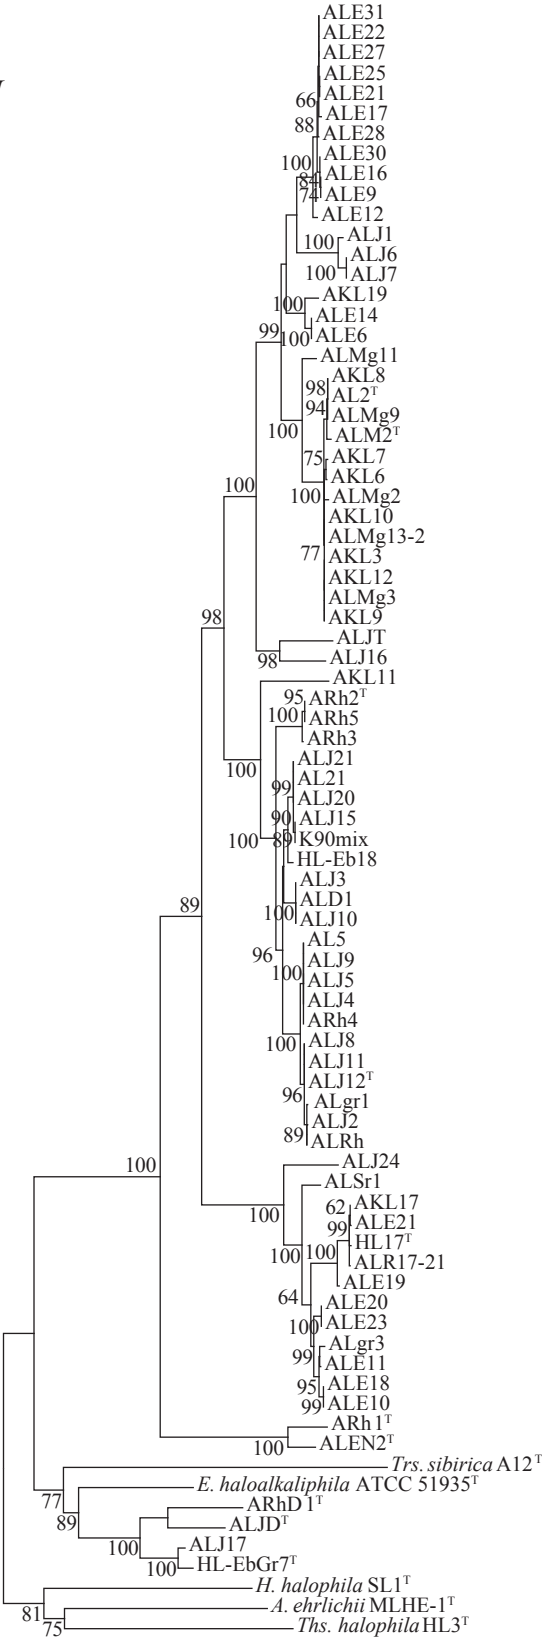

0.1

*rpoS*

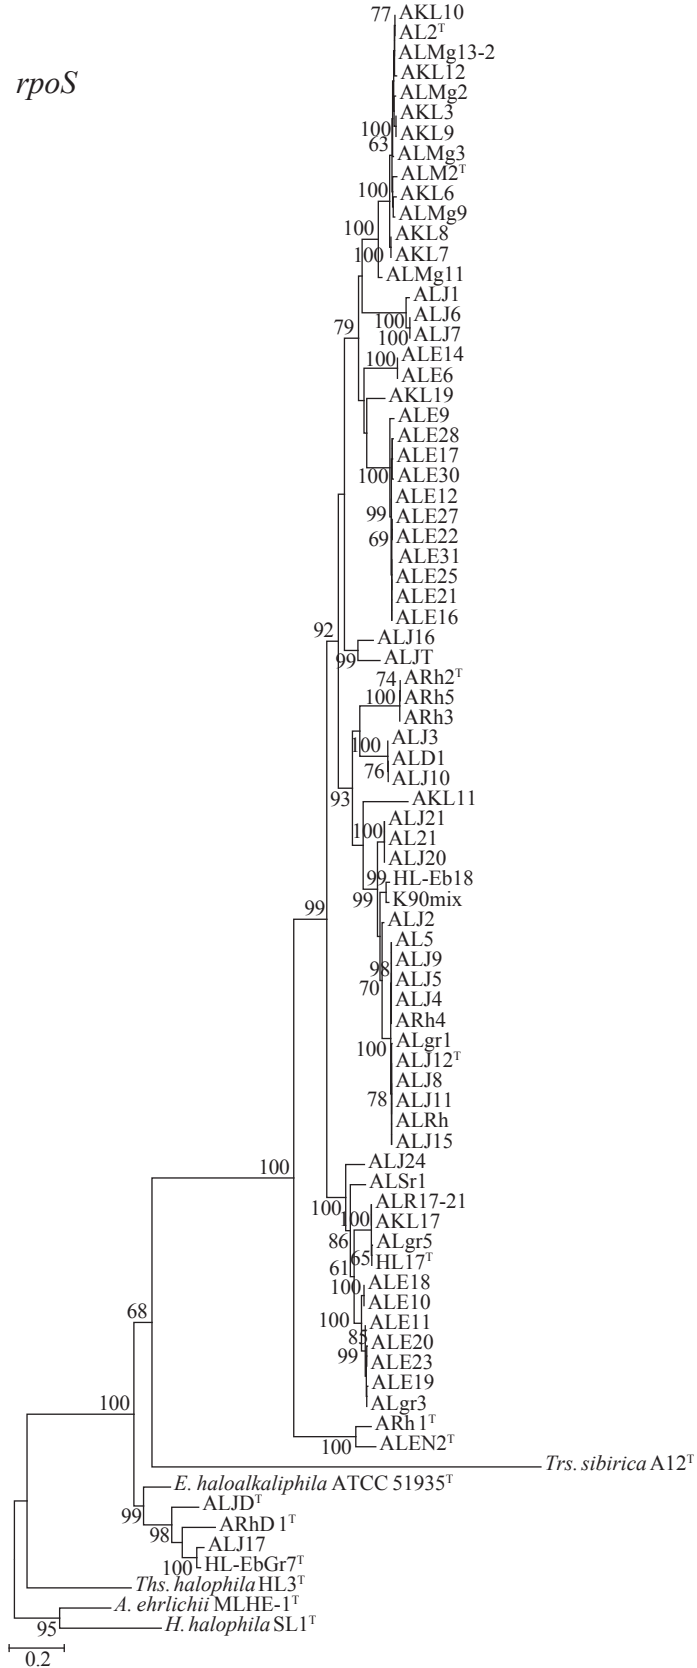

*secF*

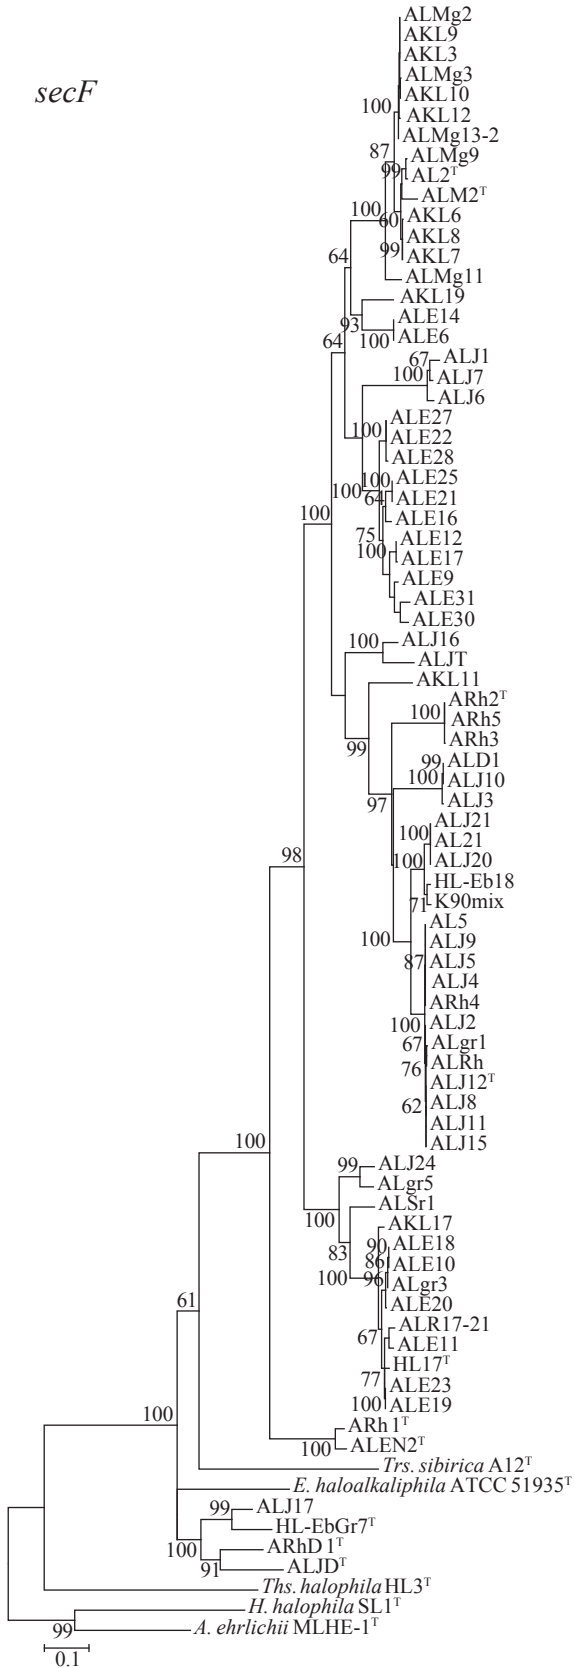

Supplement: S11 (10.1371/journal.pone.0173517.s011) [file journal.pone.0173517.s011.pdf]
