# Supplementary material for: Genomic diversity within the haloalkaliphilic genus Thioalkalivibrio
Source: PLoS One. 2017 Mar 10;12(3):e0173517. doi: 10.1371/journal.pone.0173517 (PMC5345834; doi:10.1371/journal.pone.0173517)
Supplement: S8 Table — (XLSX) [file pone.0173517.s009.xlsx]

## Sheet: Sheet1
S8 Table. Previous and current strains affiliations.
Strains	Previous affiliation	Reference	Current affiliation
ALJ1	Tv. versutus	[14]	Species group 9
ALJ2			Species group (Tv. nitratis)
ALJ3			Species group 15
ALJ4			Species group (Tv. nitratis)
ALJ5			Species group (Tv. nitratis)
ALJ6			Species group 9
ALJ7			Species group 9
ALJ8			Species group (Tv. nitratis)
ALJ9			Species group (Tv. nitratis)
ALJ11			Species group (Tv. nitratis)
ALJ15			Species group (Tv. nitratis)
ALJ16			Species group 7
ALJ17			Species group 22
ALJ20			Species group 12
AL5			Species group (Tv. nitratis)
ALD1			Species group 15
ALJ10	Tv. denitrificans		Species group 15
ALJ21	Tv. nitratis		Species group 12
ALJ17	Tv. sulfidiphilus	[20]	Species group 22
